# Supplementary material
Source: publisher figshare collection journal article supplement (https://sage.figshare.com/ndownloader/files/16924331)
Supplement: Supplementary file 1 [file 16924331]

## Appendix A

At this time, we would like you to think about a *specific group of people that you most identify with* on campus (for example, a group of friends, an organization) [*the rich, business professionals, housewives, the elderly, the homeless, welfare recipients*]. When you decide whether something is right or wrong about *this specific group of people*, to what extent are the following considerations relevant to your thinking? Note: this is purely your perspective about the group you have in mind. Please keep in mind the typical member of *this specific group* and rate each statement using this scale:

[0] = not at all relevant (This consideration has nothing to do with my judgments of right and wrong)

[1] = not very relevant

[2] = slightly relevant<sup>[SEP]</sup>

[3] = somewhat relevant

[4] = very relevant<sup>[SEP]</sup>

[5] = extremely relevant (This is one of the most important factors when I judge right and wrong)

\_\_\_\_\_ Whether or not they suffered emotionally<sup>[SEP]</sup>

\_\_\_\_\_ Whether or not they were treated differently than others

\_\_\_\_\_ Whether or not their actions showed love for their country

\_\_\_\_\_ Whether or not they showed a lack of respect for authority

\_\_\_\_\_ Whether or not they violated standards of purity and decency

\_\_\_\_\_ Whether or not they were good at math<sup>[SEP]</sup>

\_\_\_\_\_ Whether or not they cared for someone weak or vulnerable

\_\_\_\_\_ Whether or not they acted unfairly<sup>[SEP]</sup>

\_\_\_\_\_ Whether or not they did something to betray their group

\_\_\_\_\_ Whether or not they conformed to the traditions of society

\_\_\_\_\_ Whether or not they did something disgusting<sup>[SEP]</sup>

\_\_\_\_\_ Whether or not they were cruel<sup>[SEP]</sup>

\_\_\_\_\_ Whether or not they were denied their rights<sup>[SEP]</sup>

\_\_\_\_\_ Whether or not they showed a lack of loyalty<sup>[SEP]</sup>

\_\_\_\_\_ Whether or not their actions caused chaos or disorder

\_\_\_\_\_ Whether or not they acted in a way that God would approve of

Please read the following sentences while keeping in mind the typical member of the *specific group of people that you most identify with [the rich, business professionals, housewives, the elderly, the homeless, welfare recipients]*. Remember, this is purely your perspective about the group you have in mind. Then, indicate your agreement or disagreement:

- [0] Strongly disagree
- [1] Moderately disagree
- [2] Slightly disagree
- [3] Slightly agree
- [4] Moderately agree
- [5] Strongly agree

\_\_\_\_\_ Compassion for those who are suffering in this group is the most crucial virtue.

\_\_\_\_\_ When the government makes laws, the number one principle should be ensuring that everyone in this group is treated fairly.

\_\_\_\_\_ I believe they are proud of their country's history.

\_\_\_\_\_ Respect for authority is something all their children need to learn.

\_\_\_\_\_ They should not do things that are disgusting, even if no one is harmed.

\_\_\_\_\_ It is better for them to do good than to do bad.

\_\_\_\_\_ One of the worst things they could do is hurt a defenseless animal.

\_\_\_\_\_ Justice for them is the most important requirement for a society.

\_\_\_\_\_ They should be loyal to their family members, even when their family members have done something wrong.

\_\_\_\_\_ Their men and women each have different roles to play in society.

\_\_\_\_\_ I would call some acts they do wrong on the grounds that they are unnatural.

\_\_\_\_\_ It can never be right for them to kill a human being.

\_\_\_\_\_ I believe they would think it's morally wrong that rich children inherit a lot of money while poor children inherit nothing.

\_\_\_\_\_ It is more important for them to be team players than to express their selves.

\_\_\_\_\_ If any of them were a soldier and disagreed with their commanding officer's orders, I believe they would obey anyway because that is their duty.

\_\_\_\_\_ Chastity is an important and valuable virtue for them.
